# Supplementary material
Source: PubMed Central journal article supplement (PMC7002232)

Figure S1.

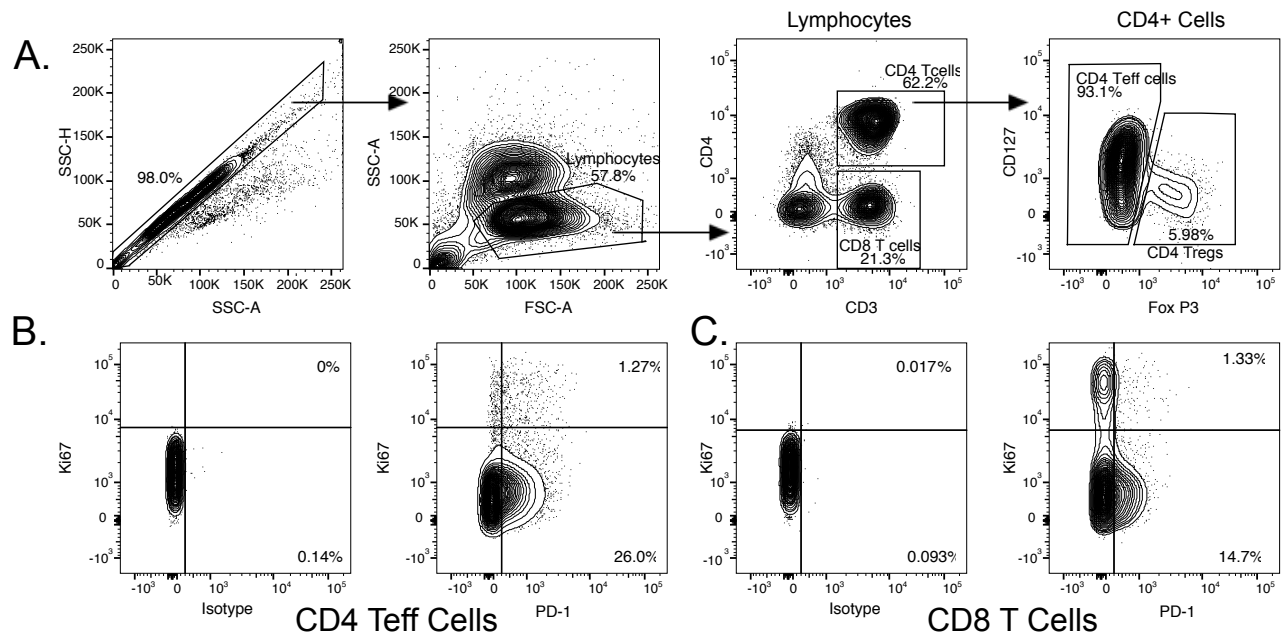

Figure S2.

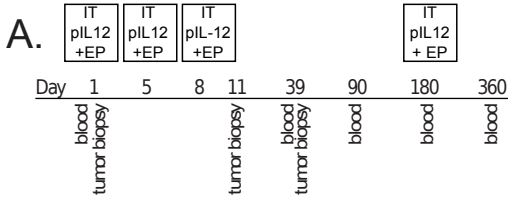

Figure S3.

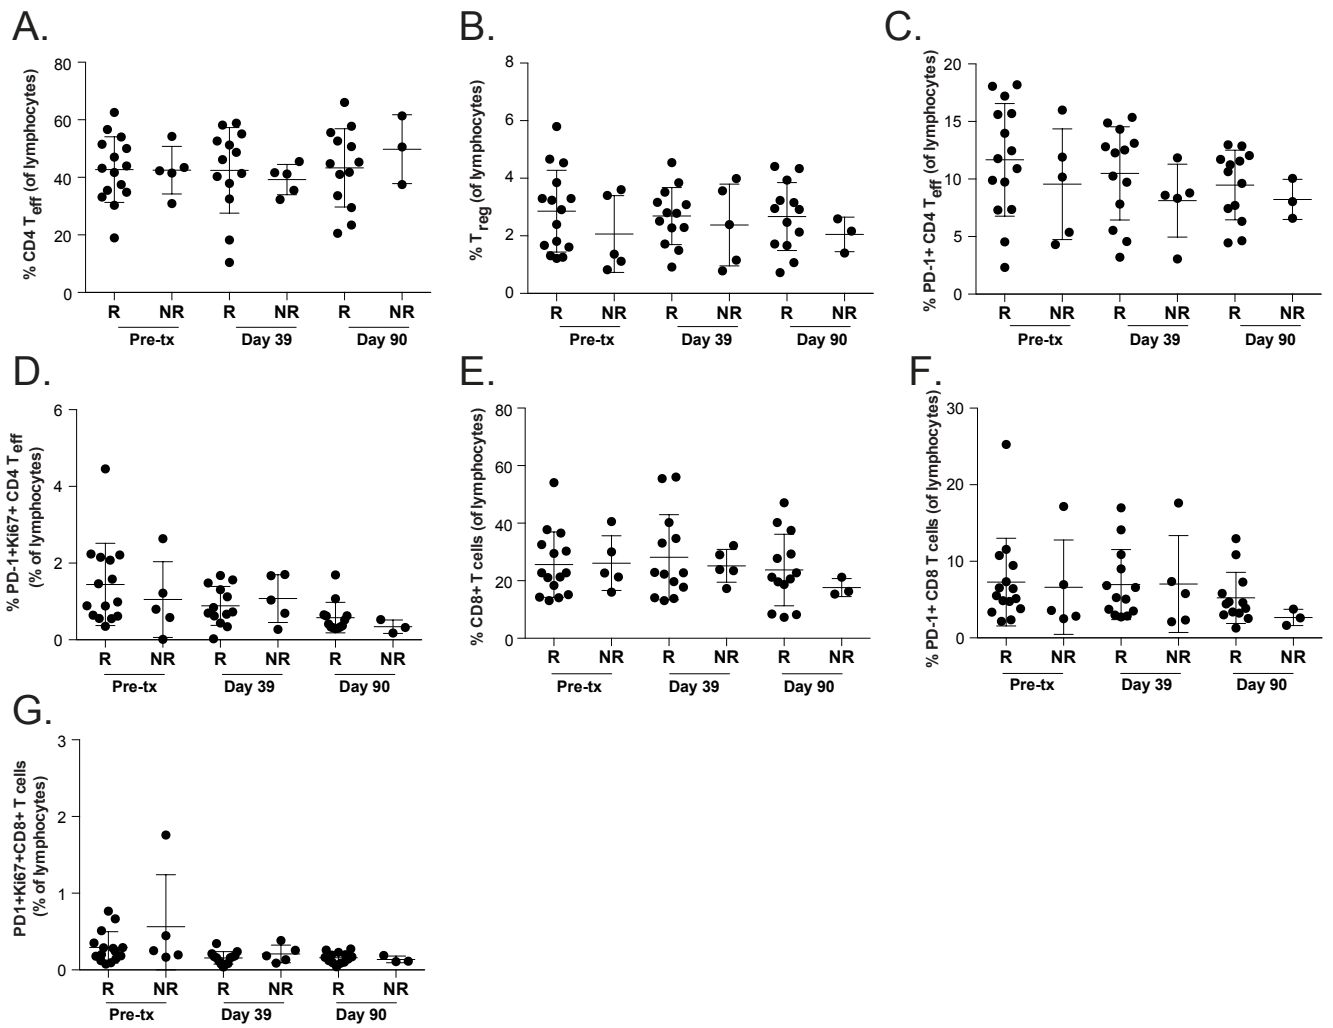

Figure S4.

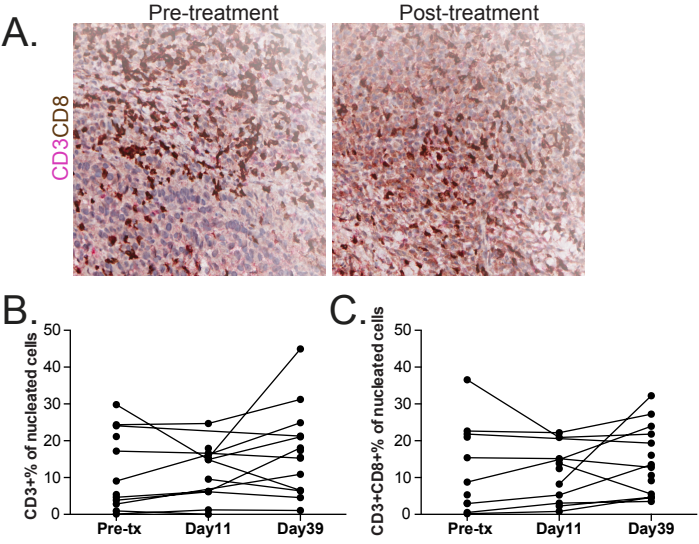

Figure S5.

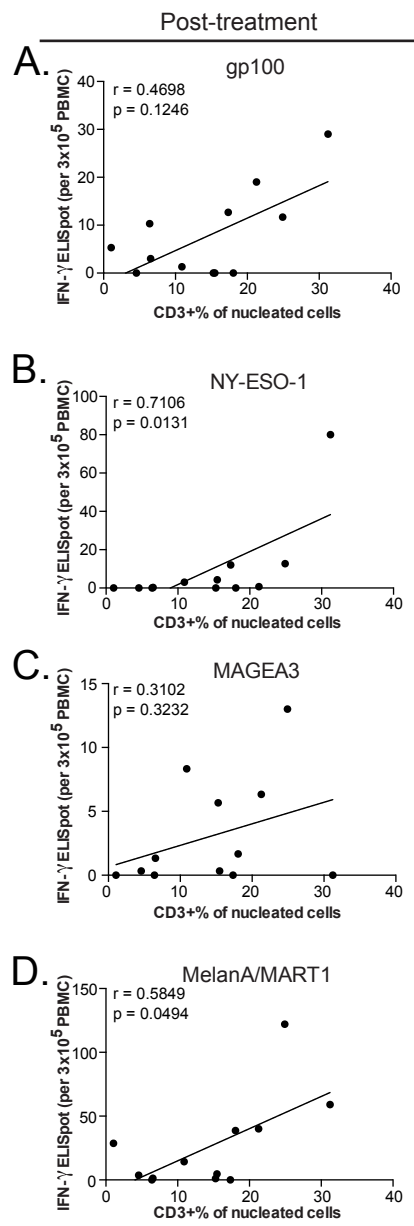

**Figure S6.**

**A.**

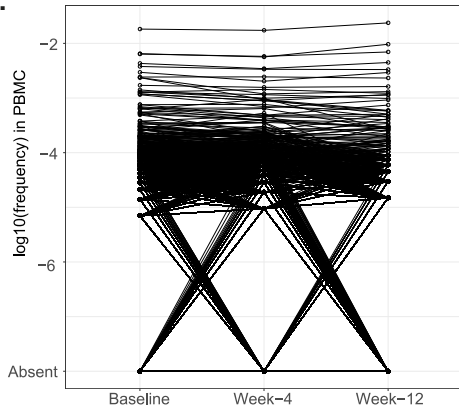

**B.**

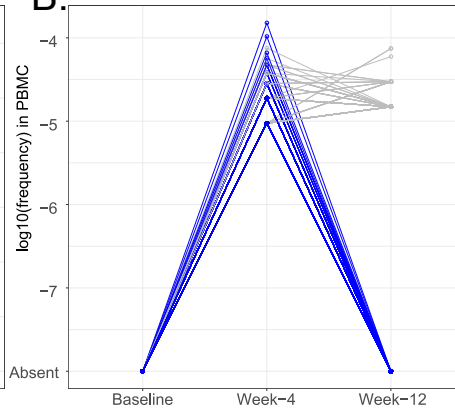

**C.**

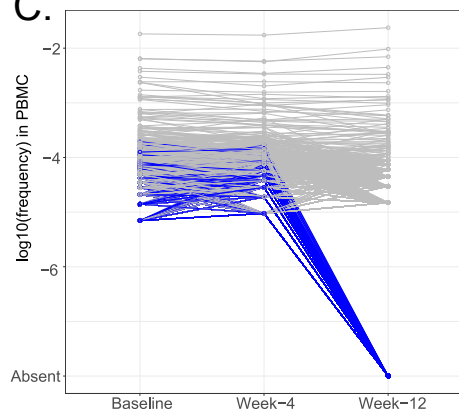

**D.**

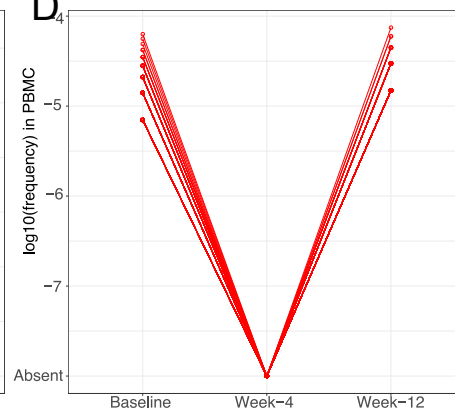

Supplement: NIHMS1546822-supplement-2.pdf [file NIHMS1546822-supplement-2.pdf]
